# Supplementary material
Source: Springer Nature journal article supplement (https://www.springermedizin.de/resource/supplementary/12895_2011_129_MOESM6_ESM.pdf/9514200)

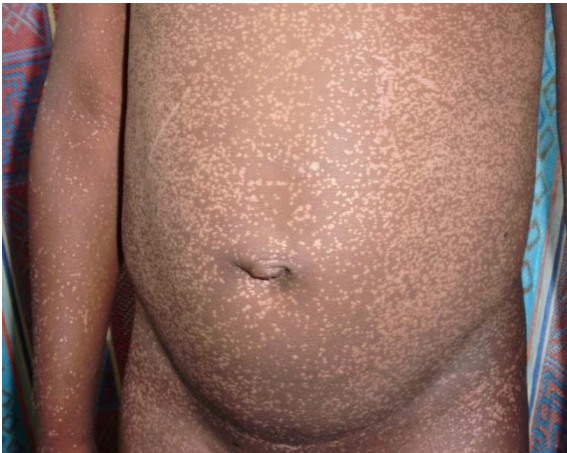

Supplement: MOESM6 [file 9514200]
